# Supplementary material for: Carnitine and Cardiac Dysfunction in Childhood Cancer Survivors Treated with Anthracyclines
Source: Oxford University Press journal article supplement (doi:10.1158/1055-9965.epi-13-1384), 2014-04-10
Supplement: 10559965epi131384-sup-tab3.xlsx [file 10559965epi131384-sup-tab3.xlsx]

## Sheet: Mteabolites
	Supplementary Table 3
	Pathway Sort Order	Super Pathway	Sub Pathway	Biochemical Name	Platform	Comp ID	KEGG	HMDB	PUBCHEM
	1	Amino acid	Glycine, serine and threonine metabolism	glycine	GC/MS	32338	C00037	HMDB00123	5257127;750
	2			sarcosine (N-Methylglycine)	GC/MS	1516	C00213	HMDB00271	1088;7311726
	3			dimethylglycine	GC/MS	5086	C01026	HMDB00092	6971056;673
	4			N-acetylglycine	GC/MS	27710		HMDB00532	10972
	7			beta-hydroxypyruvate	GC/MS	15686	C00168	HMDB01352	964
	8			serine	GC/MS	32315	C00065	HMDB00187	5951;6857581
	10			N-acetylserine	GC/MS	37076		HMDB02931	65249
	17			threonine	LC/MS pos	1284	C00188	HMDB00167	6971019;6288
	21			betaine	LC/MS pos	3141	C00719	HMDB00043	247
	25		Alanine and aspartate metabolism	asparagine	GC/MS	34283	C00152	HMDB00168	6267;6992089
	28			beta-alanine	GC/MS	35838	C00099	HMDB00056	239;4755801
	31			N-acetyl-beta-alanine	LC/MS pos	37432	C01073		76406
	32			alanine	GC/MS	32339	C00041	HMDB00161	5950;7311724
	33			N-acetylalanine	LC/MS neg	1585	C02847	HMDB00766	88064
	39		Glutamate metabolism	glutamate	GC/MS	32322	C00025	HMDB03339	611
	45			glutamine	LC/MS pos	53	C00064	HMDB00641	5961
	46			pyroglutamine*	LC/MS pos	32672			134508
	53		Histidine metabolism	histidine	LC/MS neg	59	C00135	HMDB00177	773;3651426
	56			3-methylhistidine	LC/MS neg	15677	C01152	HMDB00479	64969;6971061
	57			1-methylhistidine	GC/MS	30460	C01152	HMDB00001	92105;7020397
	75		Lysine metabolism	lysine	GC/MS	35836	C00047	HMDB00182	5962
	80			pipecolate	LC/MS pos	1444	C00408	HMDB00070	849
	86			glutarylcarnitine (C5)	LC/MS pos	35439		HMDB13130
	88		Phenylalanine & tyrosine metabolism	phenyllactate (PLA)	LC/MS neg	22130	C05607	HMDB00779	3848
	89			phenylalanine	LC/MS pos	64	C00079	HMDB00159	6925665;6140
	92			phenylacetate	LC/MS neg	15958	C07086	HMDB00209
	94			p-cresol sulfate	LC/MS neg	36103	C01468	HMDB11635	4615422
	106			tyrosine	LC/MS pos	1299	C00082	HMDB00158	6057;6942100
	107			3-(4-hydroxyphenyl)lactate	LC/MS neg	32197	C03672	HMDB00755	9378
	124			4-hydroxyphenylacetate	GC/MS	541	C00642	HMDB00020	4693933
	129			3-methoxytyrosine	LC/MS pos	12017		HMDB01434	9307
	135			phenylacetylglutamine	LC/MS pos	35126	C04148	HMDB06344	306137
	140			3-phenylpropionate (hydrocinnamate)	LC/MS neg	15749	C05629	HMDB00764
	142			phenol sulfate	LC/MS neg	32553	C02180		74426
	152		Tryptophan metabolism	kynurenine	LC/MS pos	15140	C00328	HMDB00684	161166;6971029
	153			tryptophan	LC/MS pos	54	C00078	HMDB00929	6923516;6305
	154			indolelactate	GC/MS	18349	C02043	HMDB00671	92904
	156			indoleacetate	LC/MS pos	27513	C00954	HMDB00197	802
	159			tryptophan betaine	LC/MS pos	37097	C09213		442106
	169			serotonin (5HT)	LC/MS pos	2342	C00780	HMDB00259	5202
	172			C-glycosyltryptophan*	LC/MS pos	32675
	179			3-indoxyl sulfate	LC/MS neg	27672		HMDB00682	10258
	180			indolepropionate	GC/MS	32405		HMDB02302	3744
	182		Valine, leucine and isoleucine metabolism	3-methyl-2-oxobutyrate	LC/MS neg	21047	C00141	HMDB00019	49
	183			3-methyl-2-oxovalerate	LC/MS neg	15676	C00671	HMDB03736	47
	188			beta-hydroxyisovalerate	LC/MS neg	12129		HMDB00754	69362
	190			isoleucine	LC/MS pos	1125	C00407	HMDB00172	791
	191			leucine	LC/MS pos	60	C00123	HMDB00687	7045798;6106
	200			valine	LC/MS pos	1649	C00183	HMDB00883	6971018;6287
	202			3-hydroxyisobutyrate	GC/MS	1549	C06001	HMDB00336	11966314
	203			4-methyl-2-oxopentanoate	LC/MS neg	22116	C00233	HMDB00695	70
	205			3-hydroxy-2-ethylpropionate	GC/MS	32397		HMDB00396	188979
	208			alpha-hydroxyisovalerate	LC/MS neg	33937		HMDB00407	99823
	210			isobutyrylcarnitine	LC/MS pos	33441		HMDB00736
	212			2-methylbutyrylcarnitine (C5)	LC/MS pos	35431		HMDB00378	6426901
	215			isovalerylcarnitine	LC/MS pos	34407		HMDB00688	6426851
	216			hydroxyisovaleroyl carnitine	LC/MS pos	35433
	217			tiglyl carnitine	LC/MS pos	35428		HMDB02366
	218			3-methylglutarylcarnitine (C6)	LC/MS pos	37060		HMDB00552	128145
	224		Cysteine, methionine, SAM, taurine metabolism	cysteine	GC/MS	31453	C00097	HMDB00574	5862;6419722
	227			S-methylcysteine	GC/MS	40262		HMDB02108	7058174;24417
	228			cystine	GC/MS	39512	C00491	HMDB00192	595
	237			methionine	LC/MS pos	1302	C00073	HMDB00696	6992087;6137
	239			N-acetylmethionine	LC/MS neg	1589	C02712	HMDB11745	448580
	240			alpha-ketobutyrate	LC/MS neg	4968	C00109	HMDB00005	3593277
	241			2-hydroxybutyrate (AHB)	GC/MS	21044	C05984	HMDB00008	440864
	254		Urea cycle; arginine-, proline-, metabolism	dimethylarginine (SDMA + ADMA)	LC/MS pos	36808	C03626	HMDB01539	123831
	255			arginine	LC/MS pos	1638	C00062	HMDB00517	5246487;232
	258			ornithine	GC/MS	35832	C00077	HMDB03374	6262
	260			urea	GC/MS	1670	C00086	HMDB00294	1176;16150869
	261			proline	LC/MS pos	1898	C00148	HMDB00162	145742;6971047
	263			citrulline	LC/MS pos	2132	C00327	HMDB00904	833
	266			N-methyl proline	LC/MS pos	37431			557
	267			trans-4-hydroxyproline	LC/MS pos	32306	C01157	HMDB00725	5810;6971053
	274		Creatine metabolism	creatine	LC/MS pos	27718	C00300	HMDB00064	586
	275			creatinine	LC/MS pos	513	C00791	HMDB00562	588
	278		Butanoate metabolism	2-aminobutyrate	LC/MS pos	32348	C02261	HMDB00650	439691;6971251
	291		Guanidino and acetamido metabolism	4-acetamidobutanoate	LC/MS pos	1558	C02946	HMDB03681	18189
	297		Glutathione metabolism	5-oxoproline	LC/MS neg	1494	C01879	HMDB00267	7405
	363	Peptide	Dipeptide	pro-hydroxy-pro	LC/MS pos	35127		HMDB06695	11673055
	383			cyclo(leu-pro)	LC/MS pos	37104			7074739
	454.93			phenylalanyltryptophan	LC/MS pos	41377
	457		Dipeptide derivative	anserine	LC/MS neg	15747	C01262	HMDB00194	6992114;112072
	460		gamma-glutamyl	gamma-glutamylvaline	LC/MS pos	32393		HMDB11172
	462			gamma-glutamylleucine	LC/MS pos	18369		HMDB11171	151023
	463			gamma-glutamylisoleucine*	LC/MS pos	34456		HMDB11170
	466			gamma-glutamylmethionine	LC/MS pos	37539			7009567
	470			gamma-glutamylphenylalanine	LC/MS pos	33422		HMDB00594	111299
	471			gamma-glutamyltyrosine	LC/MS pos	2734			94340
	482		Polypeptide	HWESASXX*	LC/MS neg	32836
	515	Carbohydrate	Aminosugars metabolism	erythronate*	GC/MS	33477		HMDB00613	2781043
	537		Fructose, mannose, galactose, starch, and sucrose metabolism	fructose	GC/MS	577	C00095	HMDB00660	5984
	548			mannitol	GC/MS	15335	C00392	HMDB00765	6251
	552			mannose	GC/MS	584	C00159	HMDB00169	161658
	560			sorbitol	GC/MS	15053	C00794	HMDB00247	107428
	581			methyl-beta-glucopyranoside	LC/MS neg	40480			2108
	582.8		Oligosaccharide	maltotetraose	LC/MS neg	15910	C02052	HMDB01296	446495
	583		Glycolysis, gluconeogenesis, pyruvate metabolism	1,5-anhydroglucitol (1,5-AG)	GC/MS	20675	C07326	HMDB02712
	585			glycerate	GC/MS	1572	C00258	HMDB00139	752
	589			glucose	GC/MS	20488	C00031	HMDB00122	79025
	591			1,6-anhydroglucose	GC/MS	21049		HMDB00640	11412545
	597			3-phosphoglycerate	GC/MS	40264	C00597	HMDB00807
	600			1,3-dihydroxyacetone	GC/MS	35963	C00184	HMDB01882	670
	603			pyruvate	GC/MS	599	C00022	HMDB00243	107735
	604			lactate	GC/MS	527	C00186	HMDB00190	612
	614		Nucleotide sugars, pentose metabolism	arabitol	GC/MS	38075	C00474	HMDB01851	94154
	616			ribitol	GC/MS	15772	C00474	HMDB00508
	617			threitol	GC/MS	35854	C16884	HMDB04136	169019
	620			gluconate	GC/MS	587	C00257	HMDB00625	10690
	633			xylitol	GC/MS	4966	C00379	HMDB02917	6912
	634			arabinose	GC/MS	575	C00216	HMDB00646	66308
	637			xylose	GC/MS	15835	C00181	HMDB00098	95259
	638			xylonate	GC/MS	35638	C05411		6602431
	647.03	Secondary Metabolism	Advanced glycation end-product	erythrulose	GC/MS	37427	C02045	HMDB06293	5460032
	648	Energy	Krebs cycle	citrate	GC/MS	1564	C00158	HMDB00094	311
	658			alpha-ketoglutarate	GC/MS	33453	C00026	HMDB00208	51
	659			succinate	LC/MS neg	1437	C00042	HMDB00254	1110
	660			succinylcarnitine	LC/MS pos	37058
	667			malate	GC/MS	1303	C00149	HMDB00156	525
	671		Oxidative phosphorylation	phosphate	GC/MS	11438	C00009	HMDB01429	1061
	672			pyrophosphate (PPi)	GC/MS	2078	C00013	HMDB00250	644102
	673	Lipid	Essential fatty acid	linoleate (18:2n6)	LC/MS neg	1105	C01595	HMDB00673	5280450
	677			linolenate [alpha or gamma; (18:3n3 or 6)]	LC/MS neg	34035	C06427	HMDB01388
	678			dihomo-linolenate (20:3n3 or n6)	LC/MS neg	35718	C03242	HMDB02925	5312529
	679			eicosapentaenoate (EPA; 20:5n3)	LC/MS neg	18467	C06428	HMDB01999	446284
	680			docosapentaenoate (n3 DPA; 22:5n3)	LC/MS neg	32504	C16513	HMDB01976
	681			docosapentaenoate (n6 DPA; 22:5n6)	LC/MS neg	37478	C16513	HMDB13123	6441454
	682			docosahexaenoate (DHA; 22:6n3)	LC/MS neg	19323	C06429	HMDB02183	445580
	687		Medium chain fatty acid	caproate (6:0)	LC/MS neg	32489	C01585	HMDB00535	8892
	689			caprylate (8:0)	LC/MS neg	32492	C06423	HMDB00482	379
	690			pelargonate (9:0)	GC/MS	12035	C01601	HMDB00847	5461016
	691			caprate (10:0)	LC/MS neg	1642	C01571	HMDB00511	2969
	693			10-undecenoate (11:1n1)	LC/MS neg	32497
	694			laurate (12:0)	LC/MS neg	1645	C02679	HMDB00638	3893
	695			5-dodecenoate (12:1n7)	LC/MS neg	33968		HMDB00529	5312378
	698		Long chain fatty acid	myristate (14:0)	LC/MS neg	1365	C06424	HMDB00806	11005
	699			myristoleate (14:1n5)	LC/MS neg	32418	C08322	HMDB02000	5281119
	700			pentadecanoate (15:0)	LC/MS neg	1361	C16537	HMDB00826	13849
	701			palmitate (16:0)	LC/MS neg	1336	C00249	HMDB00220	985
	702			palmitoleate (16:1n7)	LC/MS neg	33447	C08362	HMDB03229	445638
	704			margarate (17:0)	LC/MS neg	1121		HMDB02259	10465
	705			10-heptadecenoate (17:1n7)	LC/MS neg	33971			5312435
	706			stearate (18:0)	GC/MS	1358	C01530	HMDB00827	5281
	708			oleate (18:1n9)	GC/MS	1359	C00712	HMDB00207	445639
	710			cis-vaccenate (18:1n7)	GC/MS	33970	C08367		5282761
	715			stearidonate (18:4n3)	LC/MS neg	33969	C16300	HMDB06547	5312508
	716			nonadecanoate (19:0)	LC/MS neg	1356	C16535	HMDB00772	12591
	717			10-nonadecenoate (19:1n9)	LC/MS neg	33972			5312513
	722			eicosenoate (20:1n9 or 11)	LC/MS neg	33587		HMDB02231
	724			dihomo-linoleate (20:2n6)	LC/MS neg	17805	C16525		6439848
	728			arachidonate (20:4n6)	LC/MS neg	1110	C00219	HMDB01043	444899
	731			behenate (22:0)	GC/MS	12125	C08281	HMDB00944	8215
	733			docosadienoate (22:2n6)	LC/MS neg	32415	C16533		5282807
	735			adrenate (22:4n6)	LC/MS neg	32980	C16527	HMDB02226	5282844
	737			lignocerate (24:0)	GC/MS	1364	C08320	HMDB02003	11197
	761		Fatty acid, monohydroxy	3-hydroxypropanoate	GC/MS	42103	C01013	HMDB00700	5459847
	764			2-hydroxyoctanoate	LC/MS neg	22036		HMDB02264	94180
	767.9			2-hydroxydecanoic acid	LC/MS neg	42489			21488
	768			3-hydroxydecanoate	LC/MS neg	22053		HMDB02203	26612
	773			16-hydroxypalmitate	LC/MS neg	39609	C18218		10466
	774			2-hydroxystearate	LC/MS neg	17945	C03045		69417
	776			2-hydroxypalmitate	LC/MS neg	35675			92836
	780			13-HODE + 9-HODE	LC/MS neg	37752
	782		Fatty acid, dihydroxy	12,13-hydroxyoctadec-9(Z)-enoate	LC/MS neg	38395	C14829	HMDB04705	10236635
	786		Fatty acid, dicarboxylate	2-hydroxyglutarate	GC/MS	37253	C02630	HMDB00606	43
	793			sebacate (decanedioate)	LC/MS neg	32398	C08277	HMDB00792	5192
	794			azelate (nonanedioate)	LC/MS neg	18362	C08261	HMDB00784	2266
	796			dodecanedioate	LC/MS neg	32388	C02678	HMDB00623	12736
	797			tetradecanedioate	LC/MS neg	35669		HMDB00872	13185
	798			hexadecanedioate	LC/MS neg	35678		HMDB00672	10459
	799			octadecanedioate	LC/MS neg	36754		HMDB00782	70095
	801			3-carboxy-4-methyl-5-propyl-2-furanpropanoate (CMPF)	LC/MS neg	31787			123979
	807		Fatty acid, amide	stearamide	GC/MS	37487	C13846		31292
	808			linoleamide (18:2n6)	LC/MS pos	32455			6435901
	817		Fatty acid, branched	13-methylmyristic acid	LC/MS neg	38293			151014
	819			15-methylpalmitate (isobar with 2-methylpalmitate)	LC/MS neg	38768
	821			17-methylstearate	LC/MS neg	38296			3083779
	888		Fatty acid metabolism (also BCAA metabolism)	propionylcarnitine	LC/MS pos	32452	C03017	HMDB00824	107738
	890			butyrylcarnitine	LC/MS pos	32412			213144
	898		Carnitine metabolism	deoxycarnitine	LC/MS pos	36747	C01181	HMDB01161	725
	899			carnitine	LC/MS pos	15500	C00318		10917
	900			3-dehydrocarnitine*	LC/MS pos	32654	C02636	HMDB12154	6991982
	901			acetylcarnitine	LC/MS pos	32198	C02571	HMDB00201	7045767
	902			hexanoylcarnitine	LC/MS pos	32328		HMDB00705	6426853
	904			octanoylcarnitine	LC/MS pos	33936	C02838	HMDB00791	123701
	906			decanoylcarnitine	LC/MS pos	33941		HMDB00651	10245190
	908			cis-4-decenoyl carnitine	LC/MS pos	38178
	909			laurylcarnitine	LC/MS pos	34534		HMDB02250	10427569
	912			palmitoylcarnitine	LC/MS pos	22189	C02990	HMDB00222	461
	913			stearoylcarnitine	LC/MS pos	34409		HMDB00848
	914			oleoylcarnitine	LC/MS pos	35160		HMDB05065
	916		Bile acid metabolism	cholate	LC/MS neg	22842	C00695	HMDB00619
	919			glycocholate	LC/MS neg	18476	C01921	HMDB00138	10140
	920			taurocholate	LC/MS neg	18497	C05122	HMDB00036
	922			taurochenodeoxycholate	LC/MS neg	18494	C05465	HMDB00951	387316
	927			taurodeoxycholate	LC/MS neg	12261	C05463	HMDB00896	2733768
	928			glycodeoxycholate	LC/MS pos	18477	C05464	HMDB00631
	930			glycochenodeoxycholate	LC/MS pos	32346	C05466	HMDB00637
	932			glycolithocholate sulfate*	LC/MS neg	32620	C11301	HMDB02639	72222
	934			taurolithocholate 3-sulfate	LC/MS neg	36850	C03642	HMDB02580	440071
	948			glycocholenate sulfate*	LC/MS neg	32599
	949			taurocholenate sulfate*	LC/MS neg	32807
	950			glycoursodeoxycholate	LC/MS neg	39379		HMDB00708
	959		Glycerolipid metabolism	glycerol	GC/MS	15122	C00116	HMDB00131	753
	960			choline	LC/MS pos	15506	C00114		170746
	961			glycerol 3-phosphate (G3P)	GC/MS	15365	C00093	HMDB00126	754
	962			glycerophosphorylcholine (GPC)	LC/MS pos	15990	C00670	HMDB00086	657272
	971		Inositol metabolism	myo-inositol	GC/MS	19934	C00137	HMDB00211
	972			chiro-inositol	GC/MS	37112
	984		Ketone bodies	3-hydroxybutyrate (BHBA)	GC/MS	542	C01089	HMDB00357	441
	985			acetoacetate	GC/MS	33963	C00164	HMDB00060	96
	986			1,2-propanediol	GC/MS	38002	C00583	HMDB01881
	990		Lysolipid	1-palmitoylglycerophosphoethanolamine	LC/MS neg	35631		HMDB11503	9547069
	991			2-palmitoylglycerophosphoethanolamine*	LC/MS neg	35688
	992			1-palmitoleoylglycerophosphoethanolamine*	LC/MS neg	34565
	995			1-stearoylglycerophosphoethanolamine	LC/MS neg	34416		HMDB11130	9547068
	996			1-oleoylglycerophosphoethanolamine	LC/MS neg	35628		HMDB11506	9547071
	997			2-oleoylglycerophosphoethanolamine*	LC/MS neg	35687
	998			1-linoleoylglycerophosphoethanolamine*	LC/MS neg	32635		HMDB11507
	999			2-linoleoylglycerophosphoethanolamine*	LC/MS neg	36593
	1000			1-arachidonoylglycerophosphoethanolamine*	LC/MS neg	35186		HMDB11517
	1001			2-arachidonoylglycerophosphoethanolamine*	LC/MS neg	32815
	1007			1-myristoylglycerophosphocholine	LC/MS pos	35626		HMDB10379	460604
	1008			2-myristoylglycerophosphocholine*	LC/MS pos	35681
	1009			1-pentadecanoylglycerophosphocholine*	LC/MS pos	37418
	1010			1-palmitoylglycerophosphocholine	LC/MS pos	33955			86554
	1011			2-palmitoylglycerophosphocholine*	LC/MS pos	35253
	1012			1-palmitoleoylglycerophosphocholine*	LC/MS pos	33230
	1014			1-heptadecanoylglycerophosphocholine	LC/MS pos	33957		HMDB12108
	1015			1-stearoylglycerophosphocholine	LC/MS pos	33961			497299
	1016			2-stearoylglycerophosphocholine*	LC/MS pos	35255			10208382
	1017			1-oleoylglycerophosphocholine	LC/MS pos	33960			16081932
	1018			2-oleoylglycerophosphocholine*	LC/MS pos	35254
	1019			1-linoleoylglycerophosphocholine	LC/MS pos	34419	C04100		11988421
	1020			2-linoleoylglycerophosphocholine*	LC/MS pos	35257
	1022			1-eicosadienoylglycerophosphocholine*	LC/MS pos	33871
	1023			1-eicosatrienoylglycerophosphocholine*	LC/MS pos	33821
	1025			1-arachidonoylglycerophosphocholine*	LC/MS pos	33228	C05208
	1026			2-arachidonoylglycerophosphocholine*	LC/MS pos	35256
	1027			1-docosapentaenoylglycerophosphocholine*	LC/MS pos	37231
	1029			1-docosahexaenoylglycerophosphocholine*	LC/MS pos	33822
	1035			1-stearoylglycerophosphoinositol	LC/MS neg	19324
	1040			1-arachidonoylglycerophosphoinositol*	LC/MS neg	34214
	1045			1-palmitoylplasmenylethanolamine*	LC/MS neg	39270
	1051		Monoacylglycerol	1-palmitoylglycerol (1-monopalmitin)	GC/MS	21127			14900
	1055			1-oleoylglycerol (1-monoolein)	LC/MS pos	21184		HMDB11567	5283468
	1077		Sphingolipid	sphingosine	LC/MS pos	17747	C00319	HMDB00252	5353955
	1086			palmitoyl sphingomyelin	GC/MS	37506			9939941
	1087			stearoyl sphingomyelin	GC/MS	19503	C00550	HMDB01348	6453725
	1100		Sterol/Steroid	lathosterol	GC/MS	39864	C01189	HMDB01170	65728
	1101			squalene	GC/MS	1518	C00751	HMDB00256	638072
	1102			cholesterol	GC/MS	63	C00187	HMDB00067	6432564
	1104			dihydrocholesterol	GC/MS	21131		HMDB00908	6665
	1106			7-beta-hydroxycholesterol	GC/MS	35092	C03594	HMDB06119	473141
	1112			dehydroisoandrosterone sulfate (DHEA-S)	LC/MS neg	32425	C04555	HMDB01032	12594
	1113			epiandrosterone sulfate	LC/MS neg	33973	C07635	HMDB00365
	1116			androsterone sulfate	LC/MS neg	31591	C00523	HMDB02759
	1133			cortisol	LC/MS pos	1712	C00735	HMDB00063
	1135			cortisone	LC/MS pos	1769	C00762	HMDB02802	222786;408722
	1139			beta-sitosterol	GC/MS	27414	C01753	HMDB00852	222284
	1141			campesterol	GC/MS	39511	C01789	HMDB02869	173183
	1157			7-alpha-hydroxy-3-oxo-4-cholestenoate (7-Hoca)	LC/MS neg	36776	C17337	HMDB12458	3081085
	1160			4-androsten-3beta,17beta-diol disulfate 1*	LC/MS neg	37202		HMDB03818
	1161			4-androsten-3beta,17beta-diol disulfate 2*	LC/MS neg	37203		HMDB03818
	1164			5alpha-androstan-3beta,17beta-diol disulfate	LC/MS neg	37190		HMDB00493
	1167			5alpha-pregnan-3beta,20alpha-diol disulfate	LC/MS neg	37198
	1169			5alpha-pregnan-3alpha,20beta-diol disulfate 1*	LC/MS neg	37201
	1170			pregnen-diol disulfate*	LC/MS neg	32562
	1171			pregn steroid monosulfate*	LC/MS neg	32619
	1173			andro steroid monosulfate 2*	LC/MS neg	32792	C04555	HMDB02759
	1174			21-hydroxypregnenolone disulfate	LC/MS neg	37173	C05485	HMDB04026	134595
	1178			pregnenolone sulfate	LC/MS neg	38170		HMDB00774	105074
	1181			pregnanediol-3-glucuronide	LC/MS neg	40708			123796
	1187	Nucleotide	Purine metabolism, (hypo)xanthine/inosine containing	xanthine	GC/MS	3147	C00385	HMDB00292	1188
	1190			hypoxanthine	LC/MS neg	3127	C00262	HMDB00157	790
	1201		Purine metabolism, adenine containing	N1-methyladenosine	LC/MS pos	15650	C02494	HMDB03331	5460178
	1208			adenosine 5'-monophosphate (AMP)	LC/MS pos	32342	C00020	HMDB00045	15938965
	1222		Purine metabolism, guanine containing	7-methylguanine	LC/MS pos	35114	C02242	HMDB00897	11361
	1242			N6-carbamoylthreonyladenosine	LC/MS pos	35157
	1247		Purine metabolism, urate metabolism	urate	LC/MS neg	1604	C00366	HMDB00289
	1248			allantoin	GC/MS	1107	C02350	HMDB00462	204
	1268		Pyrimidine metabolism, orotate containing	dihydroorotate	GC/MS	601	C00337	HMDB03349	648
	1279		Pyrimidine metabolism, uracil containing	uridine	LC/MS neg	606	C00299	HMDB00296	6029
	1280			pseudouridine	LC/MS neg	33442	C02067	HMDB00767
	1282			5-methyluridine (ribothymidine)	LC/MS neg	35136		HMDB00884	445408
	1298	Cofactors and vitamins	Ascorbate and aldarate metabolism	ascorbate (Vitamin C)	GC/MS	1640	C00072	HMDB00044
	1300			threonate	GC/MS	27738	C01620	HMDB00943	151152
	1313		Hemoglobin and porphyrin metabolism	heme	LC/MS pos	41754	C00032	HMDB03178
	1317			bilirubin (Z,Z)	LC/MS neg	27716	C00486	HMDB00054	5280352
	1318			bilirubin (E,E)*	LC/MS pos	32586			5315454
	1320			biliverdin	LC/MS neg	2137	C00500	HMDB01008
	1323			urobilinogen	LC/MS neg	32426	C05790	HMDB04157	26818
	1324		Nicotinate and nicotinamide metabolism	nicotinamide	LC/MS pos	594	C00153	HMDB01406	936
	1346			N1-Methyl-2-pyridone-5-carboxamide	LC/MS pos	40469	C05842	HMDB04193	69698
	1347		Pantothenate and CoA metabolism	pantothenate	LC/MS neg	1508	C00864	HMDB00210	6613
	1364.1		Pyridoxal metabolism	pyridoxate	LC/MS neg	31555	C00847	HMDB00017	6723
	1372		Tocopherol metabolism	alpha-tocopherol	GC/MS	1561	C02477	HMDB01893	14985
	1376			delta-tocopherol	GC/MS	33418	C14151	HMDB02902	92094
	1377			gamma-tocopherol	GC/MS	42315	C02483	HMDB01492	14986
	1380			gamma-CEHC	LC/MS neg	37462		HMDB01931	133098
	1380.1			gamma-CEHC glucuronide*	LC/MS neg	42381
	1395	Xenobiotics	Benzoate metabolism	hippurate	LC/MS neg	15753	C01586	HMDB00714	464
	1396.1			3-methyl catechol sulfate 1	LC/MS neg	42494
	1396.2			4-methylcatechol sulfate	LC/MS neg	42493
	1398			2-hydroxyhippurate (salicylurate)	LC/MS neg	18281	C07588	HMDB00840	10253
	1399			3-hydroxyhippurate	LC/MS neg	39600		HMDB06116	450268
	1400			4-hydroxyhippurate	LC/MS neg	35527			151012
	1407			catechol sulfate	LC/MS neg	35320	C00090		3083879
	1408			benzoate	GC/MS	15778	C00180	HMDB01870	243
	1422			4-ethylphenylsulfate	LC/MS neg	36099	C13637
	1423			4-vinylphenol sulfate	LC/MS neg	36098	C05627	HMDB04072	6426766
	1430		Chemical	glycolate (hydroxyacetate)	GC/MS	15737	C00160	HMDB00115	3698251;757
	1431			iminodiacetate (IDA)	GC/MS	35837		HMDB11753	8897
	1434.1			2-hydroxyisobutyrate	GC/MS	22030		HMDB00729	11671
	1436			glycerol 2-phosphate	GC/MS	27728	C02979	HMDB02520	2526
	1471			2-ethylhexanoate	GC/MS	1554			8697
	1486			bisphenol A monosulfate	LC/MS neg	37172
	1516.9			meglumine	LC/MS pos	42638			4049
	1533		Drug	salicylate	LC/MS neg	1515	C00805	HMDB01895	338
	1538			4-acetaminophen sulfate	LC/MS neg	37475	C06804	HMDB01859	83939
	1541			4-acetamidophenol	GC/MS	12032	C06804	HMDB01859	1983
	1542			p-acetamidophenylglucuronide	LC/MS neg	33423		HMDB10316	4022661
	1543			2-hydroxyacetaminophen sulfate*	LC/MS neg	33173
	1544			2-methoxyacetaminophen sulfate*	LC/MS neg	33178
	1545			3-(cystein-S-yl)acetaminophen*	LC/MS pos	34365			5233914
	1551			2-propylpentanoate (valproate)	GC/MS	22290	C07185	HMDB01877	3121
	1553			ibuprofen	LC/MS neg	17799	D00126	HMDB01925	3672
	1565			naproxen	LC/MS neg	12122	C01517	HMDB01923	156391
	1566			desmethylnaproxen sulfate*	LC/MS neg	34346			184679
	1571			metoprolol	LC/MS pos	18037	D02358	HMDB01932	4171
	1572			metoprolol acid metabolite*	LC/MS pos	34109			62936
	1612			gabapentin	LC/MS pos	38686	D00332	HMDB05015	3446;6919078
	1625			atenolol	LC/MS pos	38658	D00235	HMDB01924	2249
	1655.2			3-(N-acetyl-L-cystein-S-yl) acetaminophen*	LC/MS pos	18299			83967
	1656		EDTA	EDTA	LC/MS neg	32511	C00284		5232305;6049
	1668		Food component/Plant	saccharin	LC/MS neg	21151	D01085		5143
	1674			quinate	GC/MS	18335	C00296	HMDB03072
	1694			piperine	LC/MS pos	33935	C03882		638024
	1727			thymol sulfate	LC/MS neg	36095	C09908	HMDB01878
	1733			N-(2-furoyl)glycine	LC/MS neg	31536		HMDB00439	21863
	1740.9			traumatic acid	LC/MS neg	42964		HMDB00933	5283028
	1753			stachydrine	LC/MS pos	34384	C10172	HMDB04827	115244
	1754			homostachydrine*	LC/MS pos	33009	C08283		441447
	1771			cinnamoylglycine	LC/MS neg	38637			709625
	1797		Xanthine metabolism	caffeine	LC/MS pos	569	C07481	HMDB01847	2519
	1798			paraxanthine	LC/MS pos	18254	C13747	HMDB01860	4687
	1799			theobromine	LC/MS pos	18392	C07480	HMDB02825	5429
	1800			theophylline	LC/MS neg	18394	C07130	HMDB01889	2153
	1803			1,7-dimethylurate	LC/MS neg	34400	C16356	HMDB11103	91611
	1805			1,3,7-trimethylurate	LC/MS neg	34404	C16361	HMDB02123	79437
	1807			3-methylxanthine	LC/MS pos	32445	C16357	HMDB01886	70639
	1808			7-methylxanthine	LC/MS pos	34390	C16353	HMDB01991	68374
	1812		Tobacco metabolite	cotinine	LC/MS pos	553		HMDB01046	854019
	1818		Sugar, sugar substitute, starch	erythritol	GC/MS	20699	C00503	HMDB02994
